# Supplementary material for: Immersive Virtual Reality for Patient-Specific Preoperative Planning: A Systematic Review
Source: PubMed Central journal article supplement (PMC9925905; doi:10.1177/15533506221143235), 2022-11-30
Supplement: sj-pdf-1-sri-10.1177_15533506221143235.pdf [file sj-pdf-1-sri-10.1177_15533506221143235.pdf]

**Table S.1: Search Strategy**

| Database       | Results | Keywords and Filters                                                                                                                                                                                                                                                                                                                                                                                                                                                                                                                                                                                                                                                                                                                                                                                               |
|----------------|---------|--------------------------------------------------------------------------------------------------------------------------------------------------------------------------------------------------------------------------------------------------------------------------------------------------------------------------------------------------------------------------------------------------------------------------------------------------------------------------------------------------------------------------------------------------------------------------------------------------------------------------------------------------------------------------------------------------------------------------------------------------------------------------------------------------------------------|
| MEDLINE        | 347     | (virtual reality.mp. OR exp virtual reality/ OR VR.mp. OR iVR.mp. OR head-mounted.mp. OR head mounted.mp. OR face-mounted.mp. OR face mounted.mp.) AND (surgical procedures, operative.mp. OR exp surgical procedures, operative/ OR surg*.mp.) AND (preop*.mp. OR pre-op*.mp. OR pre op*.mp. OR pre-surgical.mp. OR pre-surgery.mp. OR presurgical.mp. OR presurgery.mp. OR pre surg*.mp. OR patient-specific.mp. OR patient specific.mp.) AND (plan*.mp. OR train*.mp. OR practi*.mp. OR warm-up*.mp. OR warm up*.mp.)<br>Filters applied: english language, yr="2000-Current," NOT (animal/ NOT (human/ AND animal/)), remove duplicates                                                                                                                                                                        |
| EMBASE         | 836     | (virtual reality.mp. OR exp virtual reality/ OR VR.mp. OR iVR.mp. OR head-mounted.mp. OR head mounted.mp. OR face-mounted.mp. OR face mounted.mp.) AND (surgical procedures, operative.mp. OR exp surgery/ OR surg*.mp.) AND (preop*.mp. OR pre-op*.mp. OR pre op*.mp. OR pre-surgical.mp. OR pre-surgery.mp. OR presurgical.mp. OR presurgery.mp. OR pre surg*.mp. OR patient-specific.mp. OR patient specific.mp.) AND (plan*.mp. OR train*.mp. OR practi*.mp. OR warm-up*.mp. OR warm up*.mp.)<br>Filters applied: english language, yr="2000-Current," NOT (animal/ NOT (human/ AND animal/)), remove duplicates                                                                                                                                                                                               |
| CENTRAL        | 63      | ([mh"virtual reality"] OR (virtual reality):ti,ab,kw OR (VR):ti,ab,kw OR (iVR):ti,ab,kw OR (head-mounted):ti,ab,kw OR (head mounted):ti,ab,kw OR (face-mounted):ti,ab,kw OR (face mounted):ti,ab,kw) AND ([mh"surgical procedures, operative"] OR (surgical procedures, operative):ti,ab,kw OR (surg*):ti,ab,kw) AND ((preop*):ti,ab,kw OR (pre-op*):ti,ab,kw OR ("pre op*"):ti,ab,kw OR (pre-surgical):ti,ab,kw OR (pre-surgery):ti,ab,kw OR (presurgical):ti,ab,kw OR (presurgery):ti,ab,kw OR ("pre surg*"):ti,ab,kw OR (patient-specific):ti,ab,kw OR ("patient specific*"):ti,ab,kw) AND ((plan*):ti,ab,kw OR (train*):ti,ab,kw OR (practi*):ti,ab,kw OR (warm-up*):ti,ab,kw OR ("warm up*"):ti,ab,kw)<br>Filters applied: publication year from 2000 to 2020, in Trials (word variations have been searched) |
| Web of Science | 421     | ((TS=("virtual reality" OR VR OR iVR OR head-mounted OR "head mounted" OR face-mounted OR "face mounted") and TS=(surgical procedures, operative OR surg*)) AND TS=(preop* OR pre-op* OR "pre op*" OR pre-surgical OR pre-surgery OR presurgical OR presurgery OR "pre surg" OR patient-specific OR "patient specific") AND TS=(plan* OR train* OR practi* OR warm-up* OR "warm up*"))<br>Filters applied: english language, timespan=2000-2020                                                                                                                                                                                                                                                                                                                                                                    |
| Scopus         | 888     | TITLE-ABS-KEY ("virtual reality" OR VR OR iVR OR head-mounted OR "head mounted" OR face-mounted OR "face mounted") AND TITLE-ABS-KEY ("surgical procedures,operative" OR surg*) AND TITLE-ABS-KEY (preop* OR pre-op* OR "pre op" OR pre-surgical OR pre-surgery OR                                                                                                                                                                                                                                                                                                                                                                                                                                                                                                                                                 |

presurgical OR presurgery OR "pre surg\*" OR patient-specific OR "patient specific") AND TITLE-ABS-KEY (plan\* OR train\* OR practi\* OR warm-up\* OR "warm up\*")

Filters applied: english language, pubyear > 1999
